# Supplementary material for: Modelling flood losses of micro-businesses in Ho Chi Minh City, Vietnam
Source: Copernicus journal article supplement (doi:10.5194/nhess-25-2437-2025), 2025-07-22
Supplement: Supplementary file 1 [file nhess-25-2437-2025-supplement.pdf]

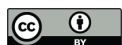

*Supplement of*

## **Modelling flood losses of micro-businesses in Ho Chi Minh City, Vietnam**

**Anna Buch et al.**

*Correspondence to:* Anna Buch ([anna.buch@uni-heidelberg.de](mailto:anna.buch@uni-heidelberg.de)) and Nivedita Sairam ([nivedita.sairam@gfz.de](mailto:nivedita.sairam@gfz.de))

The copyright of individual parts of the supplement might differ from the article licence.

# Supplementary Information

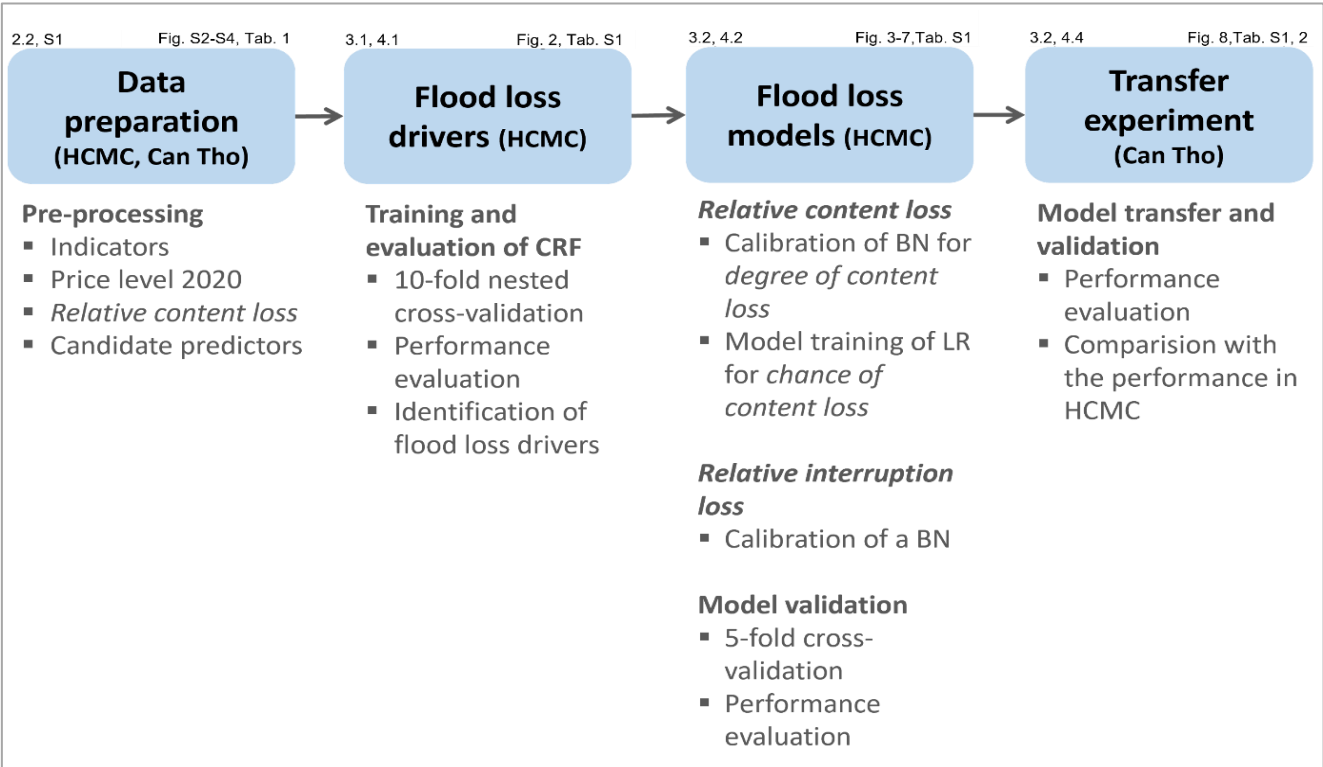

5 Figure S1: Main steps of the analysis: preparation of the survey datasets, the identification of flood loss drivers, the calibration of the flood loss models and their validation on the HCMC and Can Tho datasets (transfer experiment). Key aspects of the steps are highlighted in light grey. Values in the upper left and right corners of the main steps refer to sections and tables/figures, respectively. Abbreviations: CRF - Conditional Random Forest, LR – probabilistic logistic regression, BN - Bayesian Network.

## 10 S1: Pre-processing of the survey data

Monetary variables were reported in both surveys in Vietnamese Dong [VND]. The monetary variables are converted to Euros and, where appropriate, inflation-adjusted to 2020 via a Gross Domestic Product (GDP) price deflator (Oanda, 2024; Trading Economics, 2024). The variables from the HCMC survey that potentially explain flood losses to microbusinesses were further pre-processed to obtain a well-defined set of candidate predictors and response variables (see, Table 1). The response variables include flood loss to business contents (e.g. to furniture, electrical devices, stored products and vehicles) and business interruption losses (e.g. reduced sales and production). The latter was queried in the HCMC survey as economic losses relative to the average revenues of the microbusinesses [%], while the former was reported in terms of monetary values [VND] and thus needed to be transformed to a relative scale, i.e. as a ratio between monetary loss and the

value of the business content. The business content values were calculated by assuming that the monetary loss to an entirely commercial-used building equals the value of its damaged business content (FEMA, 2013; Huizinga et al., 2017). Since the approach is rather general and made for larger companies, we improved this approach with a correction factor (0.25) resulting in a weighted relationship between building and content values. However, some interviewees did not report the building value and thus relative content losses were not calculated for these records, resulting in a reduced number of 317 records for relative contents losses. Since business interruption losses were already queried as relative values in the HCMC survey, their number of 361 records remained unchanged. In order to derive the value of the commercially used part of the building (i.e. ground floor), we used field survey data on the number of floors in the microbusinesses or, in the case of missing data, assumed the most common building type (a two-storey building) (Moon et al., 2009).

Binary responses (0 or 1) from the survey corresponding to a specific category were combined to form indicators. For instance, the presence of several types of flood water contamination and implementation of several emergency measures were translated into indicators. Among the ordinal-scaled responses on the implementation of structural and non-structural precautionary measures and flood resilience were also converted to indicators (Sieg et al., 2017; Paprotny et al., 2020; Schoppa et al., 2020).

The indicators for emergency measures and precautionary measures are ratios between implemented measures prior to the flood event (nI) and the number of possibly implemented measures (nP). These ratios are on the interval [0, 1], where 0 assigns to businesses with no implemented measures and 1 to well-prepared businesses who implemented all possible measures prior to the flood event (Schoppa et al., 2020).

The flood resilience indicator is also a ratio but based on ranked variables of five categories. The indicator expresses the perception of the respondent on how well the government, city or the neighbourhood helps the citizens in coping with floods. For each category, the respondent could provide a response on the interval between 0 (strongly disagree) and 5 (strongly agree).

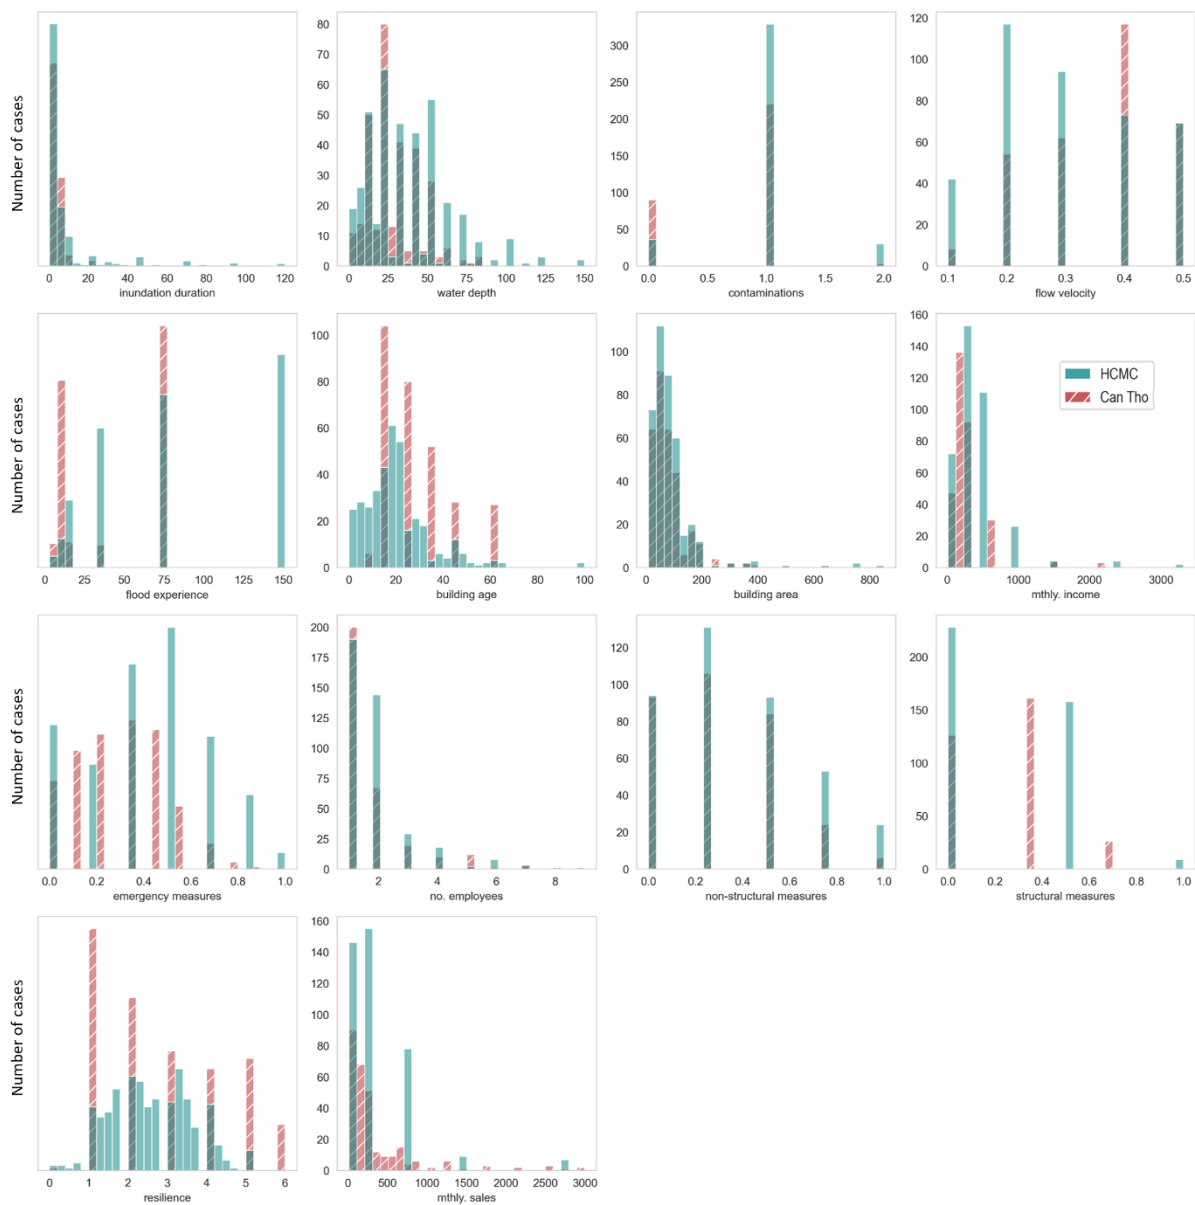

**Figure S2: Distribution of potential predictors for HCMC and Can Tho. For a better visualization three to five extreme cases are removed for the variables: inundation duration, building area and monthly sales.**

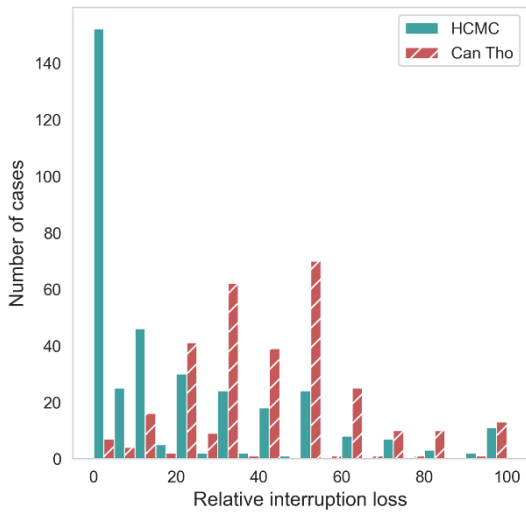

45

**Figure S3: Distribution of reported relative losses due to business interruption during the flood (HCMC) and during the flood month (Can Tho). The first bar on the left side of the HCMC dataset contains cases of zero-losses as well as a large share of cases representing minor losses (<5 % interruption losses).**

50

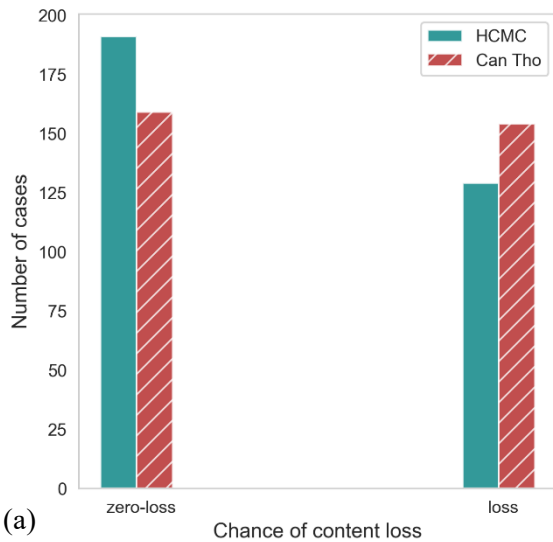

(a)

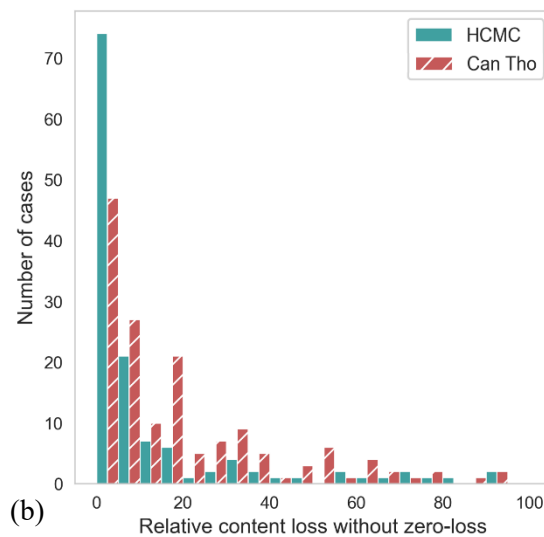

(b)

**Figure S4: Distribution of reported relative losses to business content. (a) Distribution of zero-loss and loss cases. (b) Distribution of degree of content losses (only loss cases).**

55

**Table S1: Performance metrics used in the paper**

| Performance metric                       | Equation                                                                          | Value range |
|------------------------------------------|-----------------------------------------------------------------------------------|-------------|
| Mean Absolute Error                      | $MAE(x, y) = \frac{\sum_{i=1}^N  y_i - x_i }{N}$                                  | [0,∞]       |
| Mean Bias Error                          | $MBE(x, y) = \frac{\sum_{i=1}^N y_i - x_i}{N}$                                    | [-∞, ∞]     |
| Root Mean Squared Error                  | $RMSE(x, y) = \sqrt{\frac{\sum_{i=1}^N (y_i - x_i)^2}{N}}$                        | [0, ∞]      |
| Symmetric Mean Absolute Percentage Error | $SMAPE(x, y) = 100 * \frac{\sum_{i=1}^N  y_i - x_i }{\sum_{i=1}^N  y_i  +  x_i }$ | [0, 100]    |

Symbols:  $x_i$  is the  $i$ -th observation,  $y_i$  the  $i$ -th prediction,  $N$  the sample size.

**References**

FEMA: Multi-hazard loss estimation methodology HAZUS-MH - Flood Model Technical Manual, Technical Manual, Federal Emergency Management Agency (FEMA), Washington D.C., [https://www.fema.gov/sites/default/files/2020-09/fema\\_hazus\\_flood-model\\_technical-manual\\_2.1.pdf](https://www.fema.gov/sites/default/files/2020-09/fema_hazus_flood-model_technical-manual_2.1.pdf) (last access: 11 July 2024), 2013.

Huizinga, J., De Moel, H., and Szewczyk, W.: Global flood depth-damage functions: Methodology and the database with guidelines, JRC Technical Report (EUR 28552 EN), Publications Office of the European Union, Luxembourg, <https://data.europa.eu/doi/10.2760/16510>, 2017.

Moon, K. Downes, N. K., Rujner, H., Storch, H.: Adaptation of the Urban Structure Type Approach for Vulnerability Assessment of Climate Change Risks in Ho Chi Minh City, 45th ISOCARP Congress 2009, <https://api.semanticscholar.org/CorpusID:54973884> (last access: 11 July 2024), 2009.

Oanda: Oanda currency converter, <https://www.oanda.com/currency-converter/en/?from=VND&to=EUR&amount=1#>, last access: 11 July 2024.

Paprotny, D., Kreibich, H., Morales-Nápoles, O., Castellarin, A., Carisi, F., and Schröter, K.: Exposure and vulnerability estimation for modelling flood losses to commercial assets in Europe, Sci. Total Environ., 737, 140011, <https://doi.org/10.1016/j.scitotenv.2020.140011>, 2020.

Schoppa, L., Sieg, T., Vogel, K., Zöller, G., and Kreibich, H.: Probabilistic Flood Loss Models for Companies. Water Resour. Res., 56, <https://doi.org/10.1029/2020wr027649>, 2020.

Sieg, T., Vogel, K., Merz, B., and Kreibich, H.: Tree-based flood damage modeling of companies: Damage processes and model performance, Water Resour. Res., 53, 6050–6068, <https://doi.org/10.1002/2017wr020784>, 2017.

Trading Economics: Vietnam GDP Deflator 2019-2025 Data, <https://jp.tradingeconomics.com/vietnam/gdp-deflator>, last access: 12 July 2024.
